# Supplementary material for: Medical care for migrant children in Europe: a practical recommendation for first and follow-up appointments
Source: Springer Nature journal article supplement (doi:10.1007/s00431-019-03405-9), 2019-06-26
Supplement: MOESM1 [file 16856374]

**Supplementary Material**

**Table 1 & 2 .** Quality of evidence and grades of recommendation (adapted from [94])

| **Level** | **Treatment / Prevention** | **Prognosis** | **Diagnosis** | **Symptom prevalence** |
| --- | --- | --- | --- | --- |
| 1 | RCT or SR from RCT | Validated CDR | Validated CDR | Prospective cohort study |
| 2 | Cohort study | Retrospective cohort study; CDR validated only on split samples | Exploratory cohort study;  CDR validated only on split samples | Retrospective cohort study |
| 3 | Case-control study |  | Non-consecutive study; or without consistently applied reference standards | Non-consecutive cohort study, or very limited population |
| 4 | Case-series | Case-series | Case-control study | Case-series |
| 5 | Expert opinion | Expert opinion | Expert opinion | Expert opinion |

CDR: clinical decision rule; RCT: randomised controlled trial; SR: systematic review

| **Level** | **Evidence** |
| --- | --- |
| A | Consistent level 1 studies |
| B | Consistent level 2 studies |
| C | Consistent with level 3 and 4 studies |
| D | Level 5 |
